# Supplementary material for: Synthesis and Characterization of Ionic Graft Copolymers: Introduction and In Vitro Release of Antibacterial Drug by Anion Exchange
Source: Polymers (Basel). 2020 Sep 22;12(9):2159. doi: 10.3390/polym12092159 (PMC7570301; doi:10.3390/polym12092159)
Supplement: Supplementary file 1 [file polymers-12-02159-s001.pdf]

# Supplementary Materials

## Synthesis and characterization of ionic graft copolymers: introduction and *in-vitro* release of antibacterial drug by anion exchange

Katarzyna Niesyto <sup>1</sup>, Dorota Neugebauer <sup>1\*</sup>

<sup>1</sup> Department of Physical Chemistry and Technology of Polymers, Faculty of Chemistry, Silesian University of Technology, 44-100 Gliwice, Poland

\* Correspondence: Dorota.Neugebauer@polsl.pl

Received: date; Accepted: date; Published: date

### Content:

**S1.** Synthesis of multifunctional macroinitiators P(MMA-*co*-BIEM) (example for Ia).

**Table S1.** Conversion values in synthesis of macroinitiator precursors determined by <sup>1</sup>H NMR.

**Figure S1.** <sup>1</sup>H NMR spectra of a) precursor I, and b) multifunctional macroinitiator Ia

**Figure S2.** FT-IR spectra for (a) precursor I, and (b) multifunctional macroinitiator Ia.

**Figure S3.** <sup>1</sup>H NMR spectra of a mixture a) before starting of reaction, and b) at the end of copolymerization resulting in grafted copolymer G2.

**Figure S4.** <sup>1</sup>H NMR spectra of grafted copolymers a) G2, and b) G2\_PAS.

**Figure S5.** <sup>1</sup>H NMR spectra of grafted copolymers a) G5, and b) G5\_CLV.

**Table S2.** Hydrodynamic diameters of nanoparticles determined with DLS.

**Figure S6.** DLS histograms of particles formed by graft copolymers (1 mg/mL aq. solution).

**Figure S7.** UV-Vis spectra of released drug for a) G2\_PAS, and b) G2\_CLV systems.

# S1. Synthesis of multifunctional macroinitiators P(MMA-*co*-BIEM) (example for Ia)

Comonomers HEMA (1.40 mL, 11.50 mmol) and MMA (3.70 mL, 34.50 mmol), anisole (0.50 mL), dNbpy (62.66 mg,  $15.30 \times 10^{-2}$  mmol) and CuBr (10.99 mg,  $7.67 \times 10^{-2}$  mmol) were placed into a Schlenk flask and degassed by two freeze–pump–thaw cycles. The initial sample was taken and EBiB initiator (113.77  $\mu$ L,  $7.67 \times 10^{-2}$  mmol) was introduced to the mixture. Next, the reaction flask was immersed in an oil bath at 70°C. The reaction was stopped by exposing to air. The reaction mixture diluted in THF was passed through a neutral alumina column to remove copper catalyst, then the polymer was precipitated in diethyl ether and vacuum dried. <sup>1</sup>H NMR of P(MMA-*co*-HEMA) (Figure S1a) (DMSO-*d*<sub>6</sub>,  $\delta$ , ppm): 5.01–4.72 (1H, –CH<sub>2</sub>–OH), 3.90–3.82 (2H, –CH<sub>2</sub>–OH), 4.17–4.05 (2H, –COO–CH<sub>2</sub>–), 3.56–3.48 (3H, –O–CH<sub>3</sub>), 1.94–1.57 (2H, –CH<sub>2</sub>– backbone), 1.4–0.51 (3H, –CH<sub>3</sub> backbone). FT-IR (Figure S2a) (cm<sup>–1</sup>): 3600–3100  $\nu$ (O–H), 3000–2800  $\nu$ (C–H), 1750  $\nu$ (C=O), 1150  $\nu$ (C–O).

The obtained hydroxyl-functionalized polymer **I** (0.70 g, including 0.90 mmol of HEMA units) was dissolved in pyridine (6 mL). Next, the mixture was placed in an ice bath to cool it down to 0 °C. After cooling  $\alpha$ -bromoisobutyrate bromide (BIBB) (166.21  $\mu$ L, 1.34 mmol) was added dropwise. The mixture was stirred overnight. Next, the bromoester-functionalized polymer **Ia** was precipitated in cooled water and vacuum dried. <sup>1</sup>H NMR of P(MMA-*co*-BIEM) (Figure S1b) (DMSO-*d*<sub>6</sub>,  $\delta$ , ppm): 4.47–4.28 (2H, –CH<sub>2</sub>–OOC–C–(CH<sub>3</sub>)<sub>2</sub>Br), 4.28–4.08 (2H, –COO–CH<sub>2</sub>–), 3.74–3.44 (3H, –O–CH<sub>3</sub>), 2.02–1.91 (6H, –(CH<sub>3</sub>)<sub>2</sub>Br initiating moiety), 1.94–1.57 (2H, –CH<sub>2</sub>– backbone), 1.4–0.51 (3H, –CH<sub>3</sub> backbone). FT-IR (Figure S2b) (cm<sup>–1</sup>): 3000–2800  $\nu$ (C–H), 1750  $\nu$ (C=O), 1150  $\nu$ (C–O).

**Table S1.** Conversion values in synthesis of macroinitiator precursors determined by <sup>1</sup>H NMR.

|    | HEMA conversion | MMA conversion | total conversion |
|----|-----------------|----------------|------------------|
| I  | 32              | 31             | 31               |
| II | 44              | 53             | 49               |

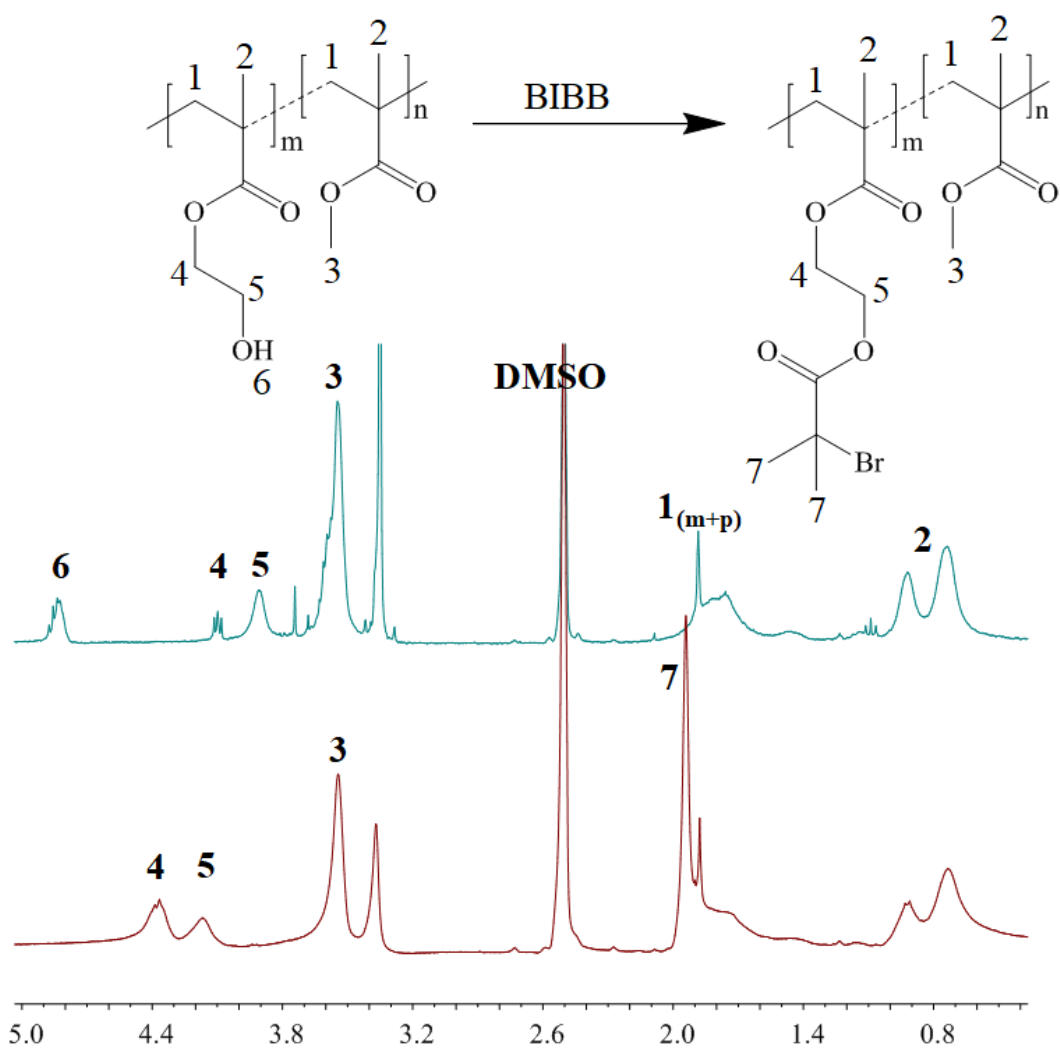

**Figure S1.** <sup>1</sup>H NMR spectra of a) precursor I, and b) multifunctional macroinitiator Ia.

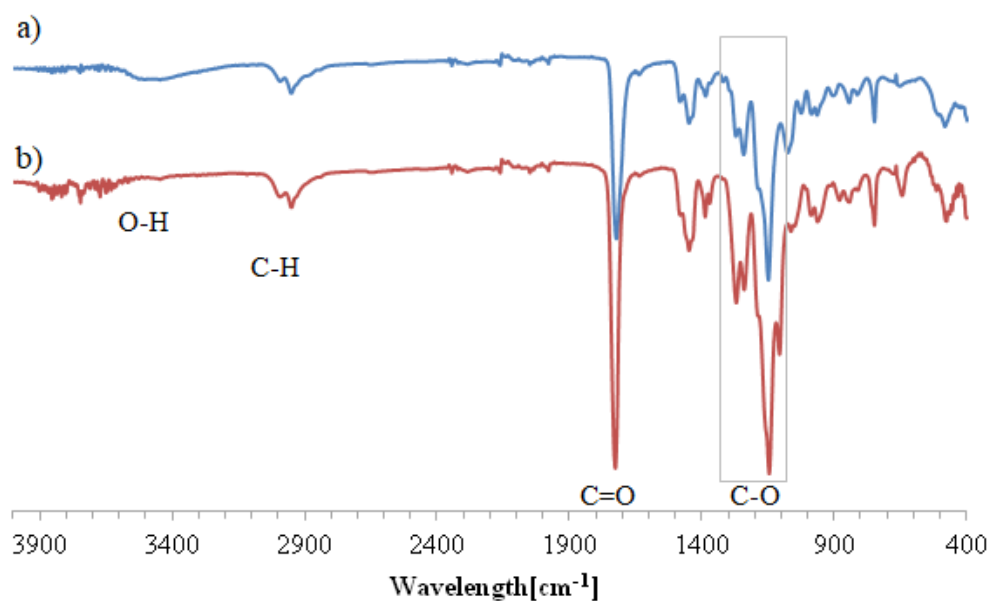

**Figure S2.** FT-IR spectra for (a) precursor **I**, and (b) multifunctional macroinitiator **Ia**.

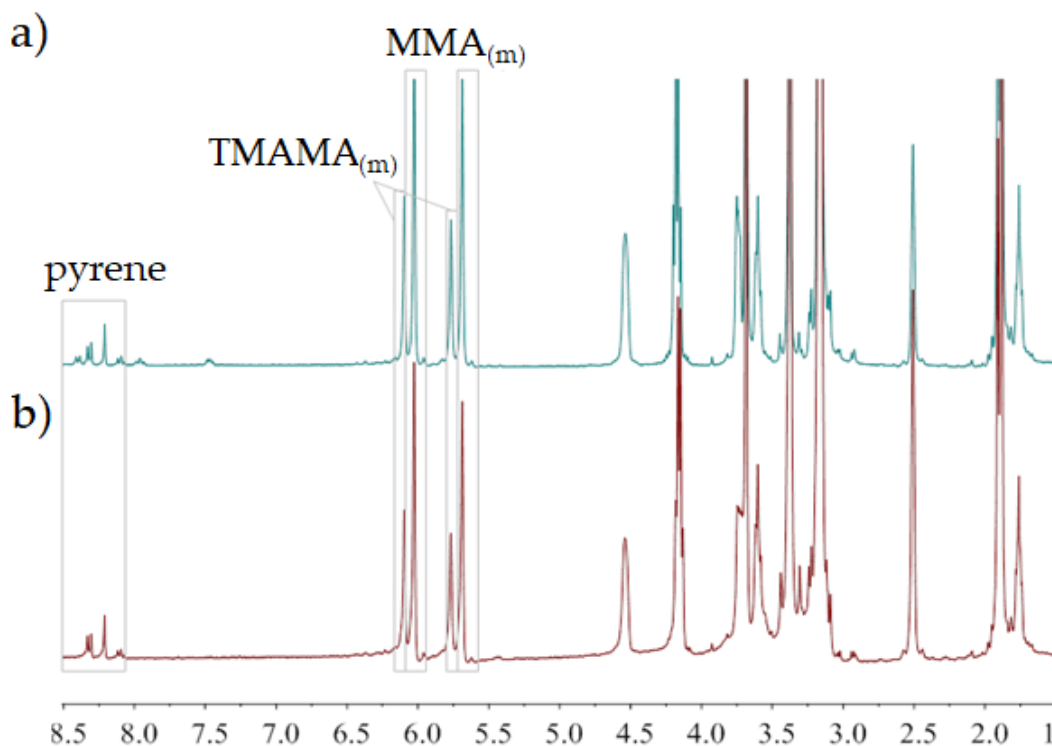

**Figure S3.**  $^1\text{H}$  NMR spectra of a mixture a) before starting of reaction, and b) at the end of copolymerization resulting in grafted copolymer **G2**.

$^1\text{H}$  NMR (DMSO- $d_6$ ,  $\delta$ , ppm): 4.63-4.43 (2H,  $-\text{CH}_2\text{-O}-$ ), 4.47-4.28 (2H,  $-\text{CH}_2\text{-OOC-C-}(\text{CH}_3)_2\text{Br}$ ), 4.28-4.08 (2H,  $-\text{COO-CH}_2$ ), 3.86-3.65 (2H,  $-\text{CH}_2\text{-N}^+$ ), 3.65-3.47 (3H,  $-\text{O-CH}_3$ ), 3.42-3.01 (9H,  $-\text{N}^+\text{-(CH}_3)_3$ ), 1.98-1.82 (6H,  $-(\text{CH}_3)_2\text{Br}$  initiating moiety), 1.4-0.51 (3H,  $-\text{CH}_3$  backbone).

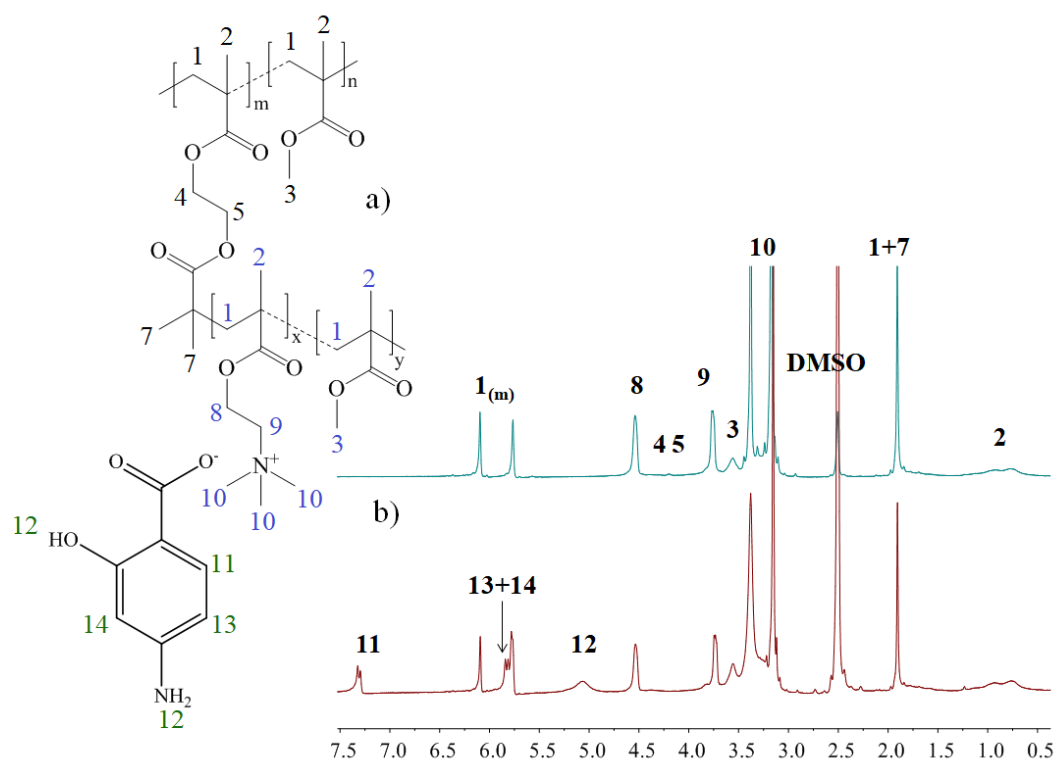

**Figure S4.**  $^1\text{H}$  NMR spectra of grafted copolymers a) G2, and b) G2\_PAS, where \* 1(m) is related to monomer residue.

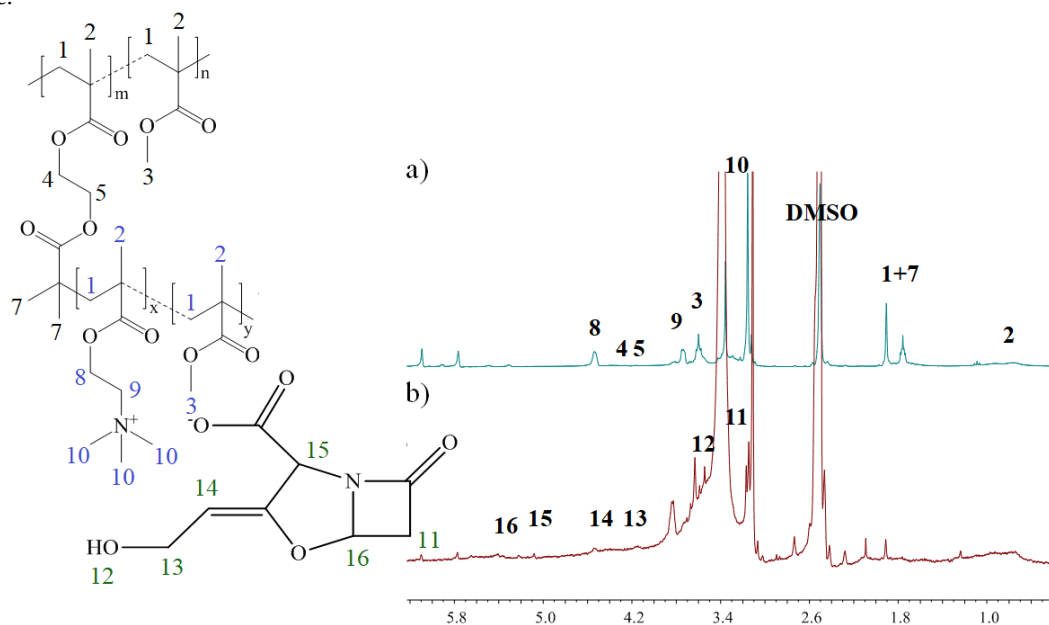

**Figure S5.**  $^1\text{H}$  NMR spectra of grafted copolymers a) G5, and b) G5\_CLV, where \* 1(m) is related to monomer residue.

**Table S2.** Hydrodynamic diameters of nanoparticles determined with DLS<sup>a</sup>.

|           | Cl <sup>-</sup> |           |               | PAS <sup>-</sup> |           |           | CLV <sup>-</sup> |           |           |
|-----------|-----------------|-----------|---------------|------------------|-----------|-----------|------------------|-----------|-----------|
|           | PDI             | Size [nm] | Intensity [%] | PDI              | Size [nm] | Intensity | PDI              | Size [nm] | Intensity |
| <b>G1</b> | 0.361           | 88        | 56            | 0.503            | 145       | 59        | 0.601            | 148       | 75        |
|           |                 | 368       | 25            |                  |           |           |                  |           |           |
|           |                 | 21        | 17            |                  |           |           |                  |           |           |
| <b>G2</b> | 0.427           | 124       | 60            | 0.114            | 261       | 100       | 0.365            | 21        | 80        |
|           |                 | 21        | 40            |                  |           |           |                  | 357       | 20        |
| <b>G3</b> | 0.295           | 203       | 98            | 0.775            | 354       | 100       | 0.442            | 26        | 69        |
|           |                 |           |               |                  |           |           |                  | 250       | 31        |
| <b>G4</b> | 0.454           | 18        | 64            | 0.264            | 24        | 89        | 0.397            | 25        | 83        |
|           |                 | 125       | 32            |                  |           |           |                  | 240       | 11        |
| <b>G5</b> | 0.444           | 114       | 94            | 0.265            | 75        | 100       | 0.268            | 91        | 100       |
| <b>G6</b> | 0.293           | 105       | 99            | 0.291            | 127       | 100       | 0.253            | 86        | 100       |
| <b>G7</b> | 0.241           | 72        | 100           | 0.443            | 194       | 82        | 0.316            | 75        | 98        |
|           |                 |           |               |                  | 37        | 18        |                  |           |           |
| <b>G8</b> | 0.349           | 95        | 98            | 0.459            | 206       | 54        | 0.163            | 48        | 98        |
|           |                 |           |               |                  | 40        | 46        |                  |           |           |

<sup>a</sup>concentration of copolymer in water: 1mg/mL.

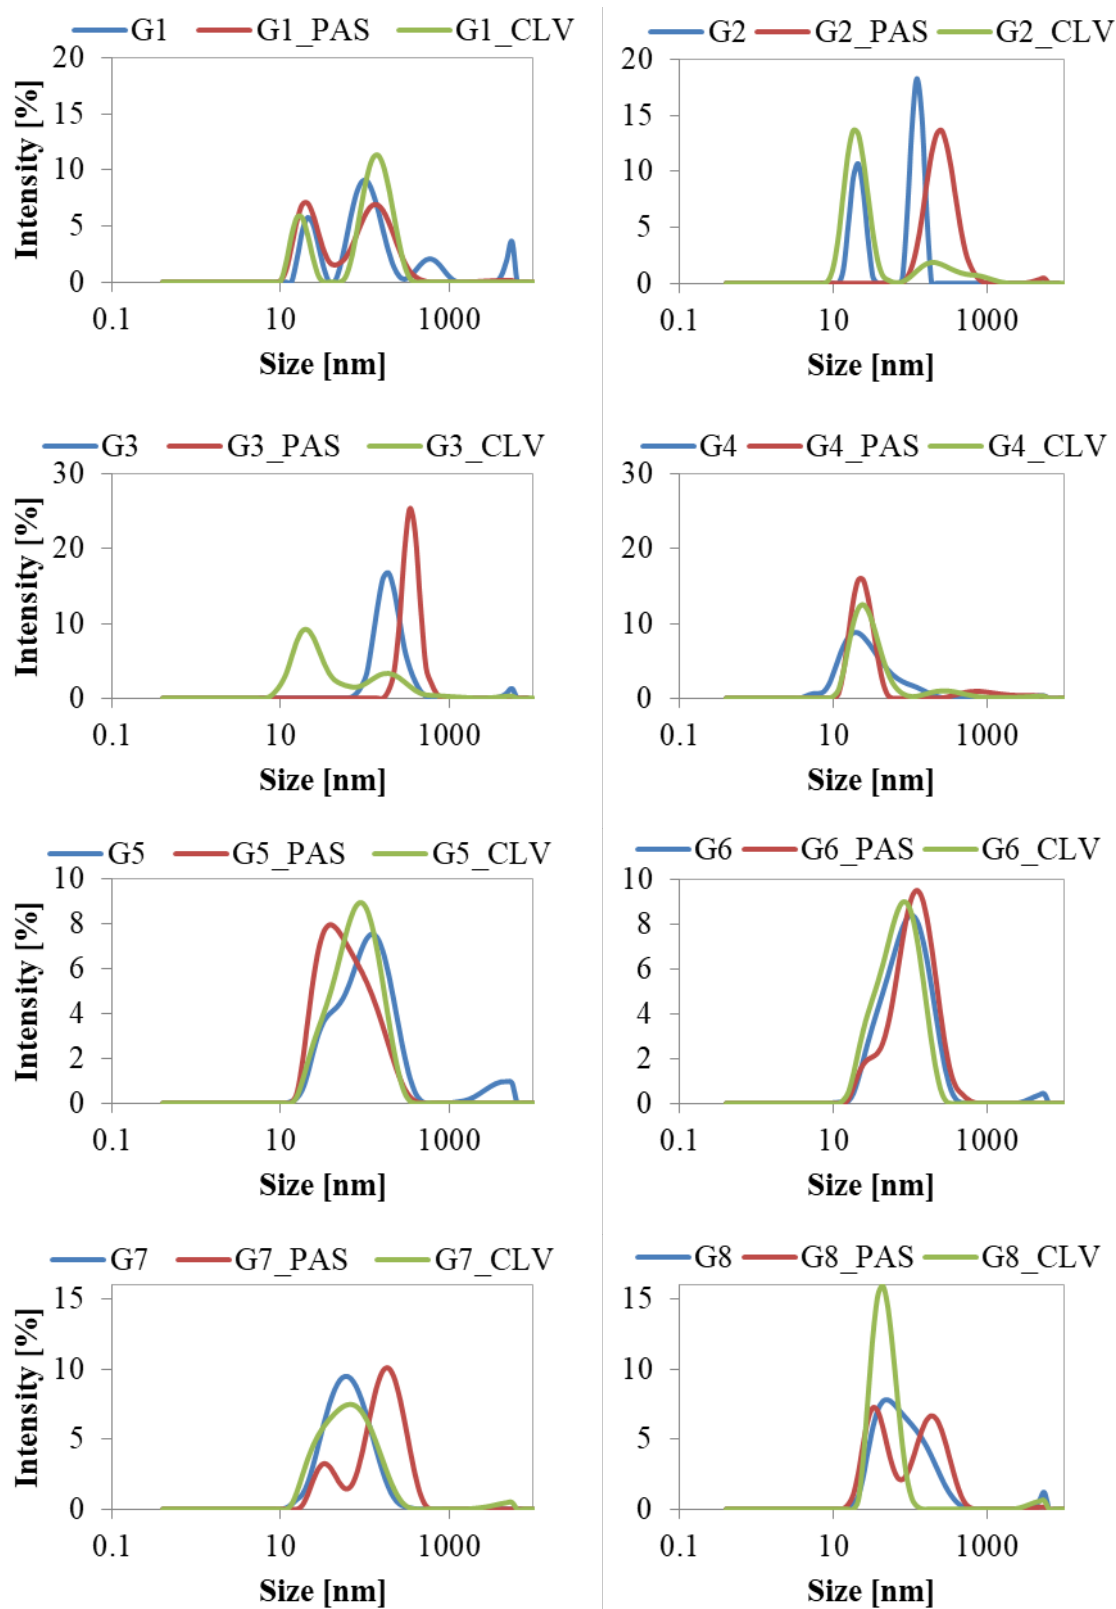

**Figure S6.** DLS histograms of particles formed by graft copolymers (1 mg/mL aq. solution).

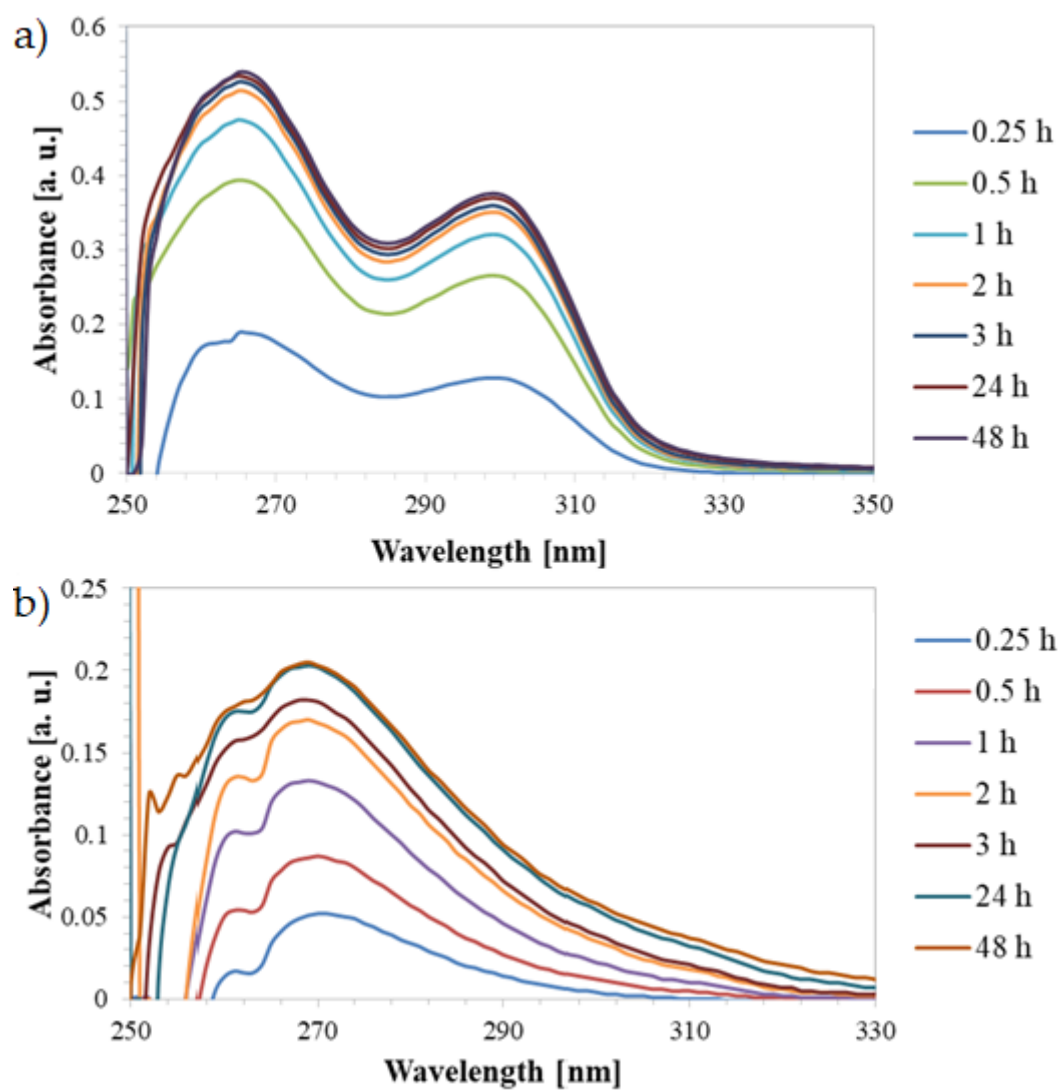

**Figure S7.** UV-Vis spectra of released drug for a) G2\_PAS, and b) G2\_CLV systems.
